# Supplementary material for: A simple pincer-type chemosensor for reversible fluorescence turn-on detection of zinc ion at physiological pH range
Source: Royal Society of Chemistry journal article supplement (doi:10.1039/c5nj00023h), 2015-01-01
Supplement: c5nj00023h1.pdf [file c5nj00023h1.pdf]

## Supporting Information

### **A simple pincer-type chemosensor for reversible fluorescence turn-on detection of zinc ion at physiological pH range**

Qi Lin\*, Yi Cai, Qiao Li, Jing Chang, Hong Yao, You-Ming Zhang and Tai-Bao Wei\*

*Key Laboratory of Eco-Environment-Related Polymer Materials, Ministry of  
Education of China; Key Laboratory of Polymer Materials of Gansu Province;  
College of Chemistry and Chemical Engineering, Northwest Normal University,  
Lanzhou, Gansu, 730070, P. R. China*

#### **General procedure for UV–vis experiments.**

The solution of sensor **Y** ( $2.0 \times 10^{-4}$  M) in DMSO was prepared and stored in dry atmosphere. The solution was used for all spectroscopic studies after appropriate dilution. Solutions of  $1.0 \times 10^{-2}$  mol·L<sup>-1</sup> TBA salts of the respective anions (F<sup>-</sup>, Cl<sup>-</sup>, Br<sup>-</sup>, I<sup>-</sup>, AcO<sup>-</sup>, H<sub>2</sub>PO<sub>4</sub><sup>-</sup>, ClO<sub>4</sub><sup>-</sup> and HSO<sub>4</sub><sup>-</sup>) and the sodium salts of CN<sup>-</sup>, and SCN<sup>-</sup> were prepared in H<sub>2</sub>O. Solutions of metal ions were prepared from the perchlorate salts of Fe<sup>3+</sup>, Hg<sup>2+</sup>, Ag<sup>+</sup>, Ca<sup>2+</sup>, Cu<sup>2+</sup>, Co<sup>2+</sup>, Ni<sup>2+</sup>, Cd<sup>2+</sup>, Zn<sup>2+</sup> and Mg<sup>2+</sup>. Any changes in the UV-vis spectra of sensor **Y** were recorded upon the addition of salts while keeping the concentration of sensor **Y** ( $2.0 \times 10^{-5}$  M) in all experiments.

#### **General procedure for fluorescence experiments.**

The solution of sensor **Y** ( $2.0 \times 10^{-4}$  M) in DMSO was prepared and stored in dry atmosphere. The solution was used for all spectroscopic studies after appropriate dilution. Solutions of  $1.0 \times 10^{-2}$  mol·L<sup>-1</sup> TBA salts of the respective anions (F<sup>-</sup>, Cl<sup>-</sup>, Br<sup>-</sup>, I<sup>-</sup>, AcO<sup>-</sup>, H<sub>2</sub>PO<sub>4</sub><sup>-</sup>, HSO<sub>4</sub><sup>-</sup> and ClO<sub>4</sub><sup>-</sup>) and the sodium salts of CN<sup>-</sup> and SCN<sup>-</sup> were prepared in H<sub>2</sub>O. Solutions of metal ions were prepared from the perchlorate salts of Fe<sup>3+</sup>, Hg<sup>2+</sup>, Ag<sup>+</sup>, Ca<sup>2+</sup>, Cu<sup>2+</sup>, Co<sup>2+</sup>, Ni<sup>2+</sup>, Cd<sup>2+</sup>, Zn<sup>2+</sup> and Mg<sup>2+</sup>. The fluorescence spectra were obtained by excitation at 355 nm. The excitation slit widths were 3 nm and emission slit widths were 5 nm, respectively. Any changes in the Fluorescence spectra of sensor **Y** were recorded upon the addition of salts while keeping the concentration of sensor **Y** ( $2.0 \times 10^{-5}$  M) in all experiments.

#### **General procedure for <sup>1</sup>H NMR experiments.**

For <sup>1</sup>H NMR, sensor **Y** was prepared in DMSO-*d*<sub>6</sub>. All solutions were mixed directly in NMR tube.

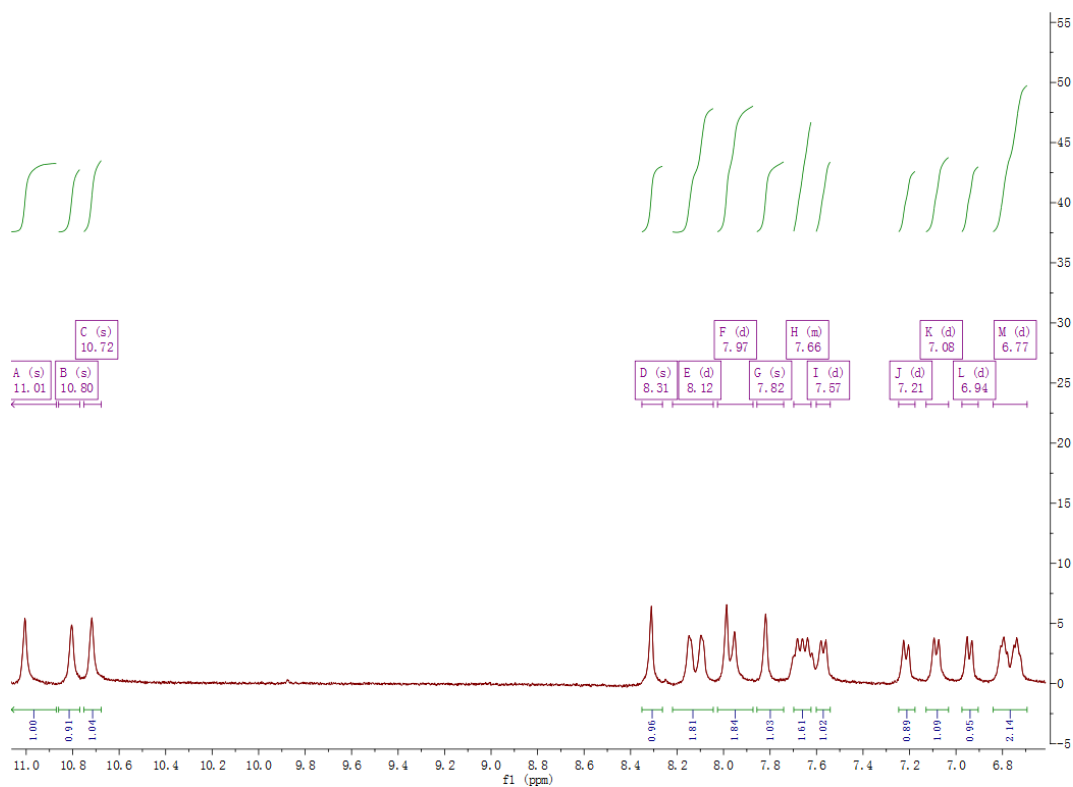

**Fig. S1.** Partial  $^1\text{H}$  NMR and spectra of compound **Y** in  $\text{DMSO-}d_6$ .

### The characterization of **Y** by ESI-MS

The  $[\text{Y} + \text{H}^+]^+$  peak appeared at 333.1727 ( $m/z_{\text{calcd}}=333.3592$ ), which is coinciding well with that for the species  $[\text{C}_{18}\text{H}_{16}\text{N}_6\text{O} + \text{H}^+]^+$  ( $m/z_{\text{calcd}}=333.3592$ ).

## Generic Display Report

### Analysis Info

Analysis Name D:\Data\YANGY\New\CHANJING140925\_2.d  
Method POS\_100-1000.m  
Sample Name QINJIJINCAN140925  
Comment

Acquisition Date 9/26/2014 9:35:06 AM

Operator LZU  
Instrument micrOTOF

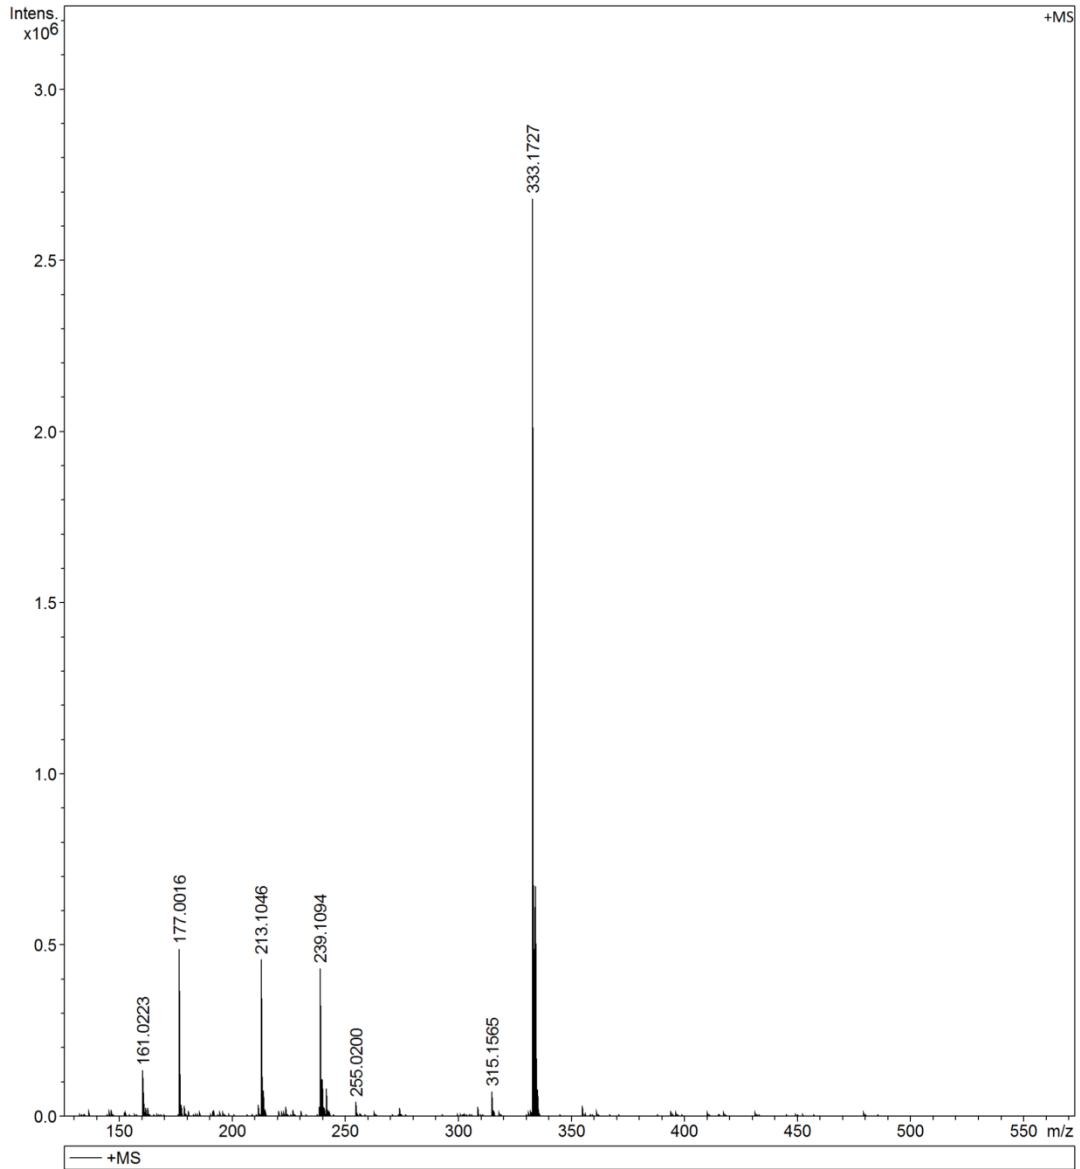

**Fig. S2.** ESI-MS spectrum of compound Y.

**The Job's plot of Y to Zn<sup>2+</sup>.**

The plot indicating the 1:1 stoichiometry for Zn<sup>2+</sup>-Y clearly.

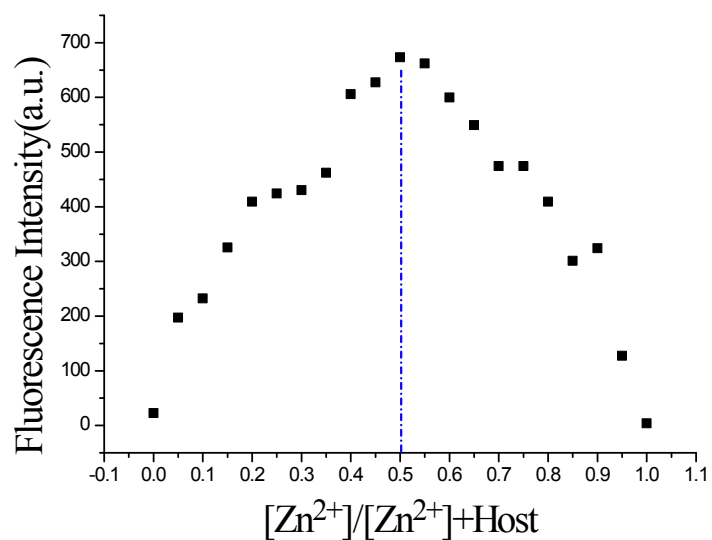

**Fig. S3.** The Job's plot examined between **Y** and Zn<sup>2+</sup>.

#### **General procedure for <sup>1</sup>H NMR experiments.**

For <sup>1</sup>H NMR titrations, sensor **Y** was prepared in DMSO-*d*<sub>6</sub>, Zn<sup>2+</sup> was prepared in DMSO-*d*<sub>6</sub>. First of all, only sensor **Y** in DMSO-*d*<sub>6</sub> were added into NMR tube, and then added Zn<sup>2+</sup> ion at 0.1, 0.5, 1.0, 2.0, 5.0 equiv. sequentially. All solutions were mixed directly in NMR tube.

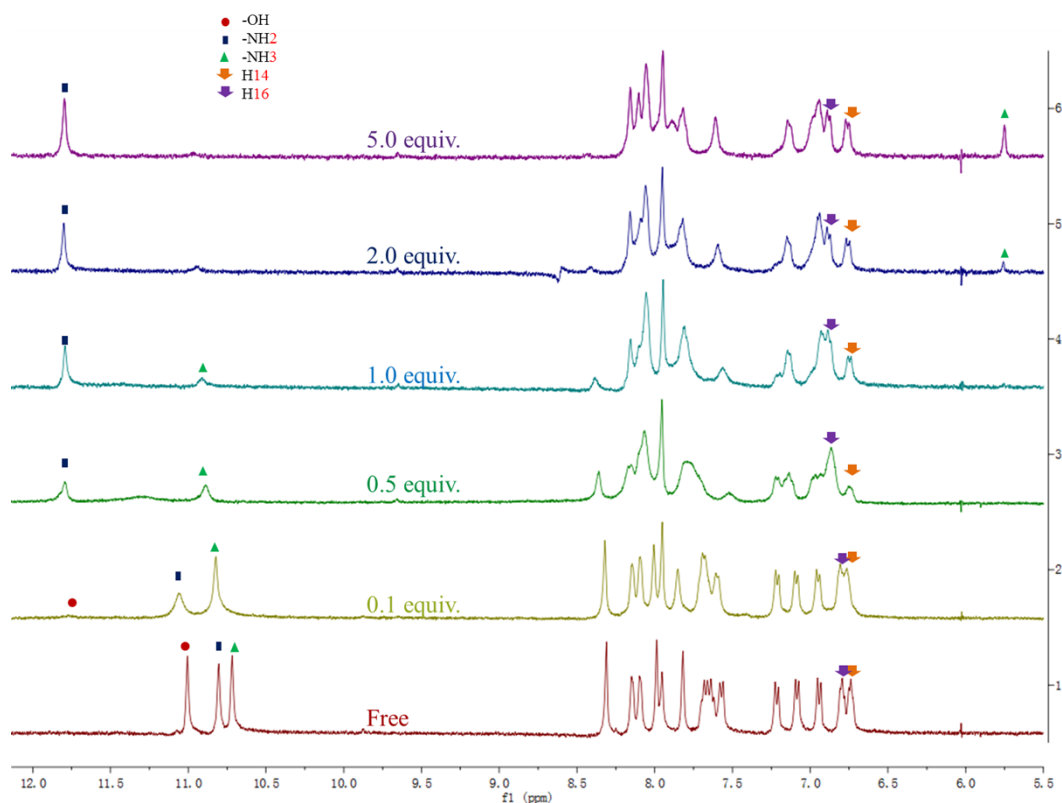

**Fig. S4.** Partial  $^1\text{H}$  NMR and spectra of compound **Y** in  $\text{DMSO-}d_6$  upon addition of  $\text{Zn}^{2+}$ .

### The association constant for $\text{Zn}^{2+}$ -**Y** complexation.

The association constants ( $K_a$ ) of  $\text{Zn}^{2+}$ -**Y** were calculated based on the titration curve of the probes with ions. Association constants were determined by a nonlinear least squares fit of the data with the following equation as referenced elsewhere. Where  $x$  is  $I-I_0/I_{\text{max}}-I_0$ ,  $y$  is the concentration of metal ions,  $a$  is the association constant, and  $b$  is the concentration of sample.

$$y = x/[2 \times a \times b \times (1-x)^2] + (x \times b)/2$$

### The quantum yield of **Y** and $\text{Zn}^{2+}$ -**Y**.

The quantum yield of sensor **Y** and  $\text{Zn}^{2+}$ -**Y** were determined according to the literature. Where  $\Phi$  is fluorescence quantum yield,  $I$  is the integrated fluorescence

intensity,  $n$  is the refractive index of solvent, and  $A$  is the optical density (absorption).

The subscript R refers to the reference of quinine sulfate.

$$\Phi = \Phi_R \frac{I}{I_R} \frac{A_R}{A} \frac{n^2}{n_R^2}$$

**The UV-vis spectrum experiments of Y to Zn<sup>2+</sup>.**

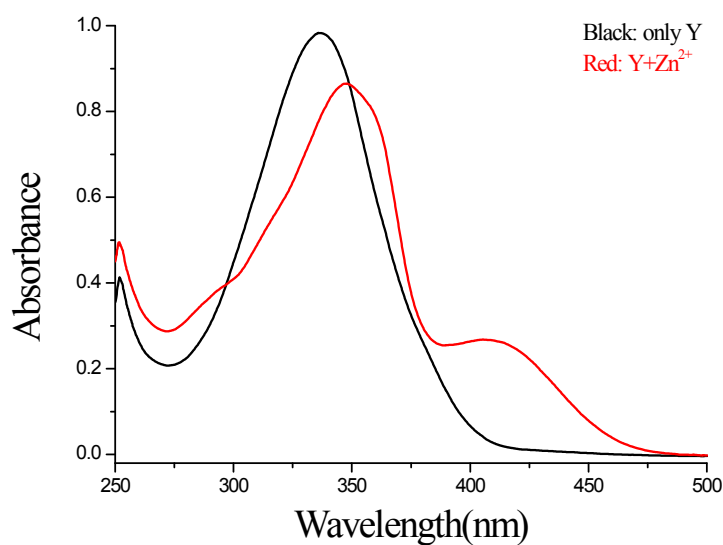

**Fig. S5.** The UV-vis spectrums of compound Y and Y+Zn<sup>2+</sup>.

**The detection limit of Y to Zn<sup>2+</sup>.**

The detection limit of fluorescence spectra result of the analysis as follows:

Linear Equation:  $Y = 337.709 X + 51.67624$

$$R^2 = 0.979$$

$$S = 3.37 \times 10^8$$

$$\delta = \sqrt{\frac{\sum (F_0 - \bar{F}_0)^2}{N-1}} = 1.563 \quad (N=19)$$

$$K = 3$$

$$\text{LOD} = 3 \times 1.563 / 5.77 \times 10^9 = 1.39 \times 10^{-8} \text{ M}$$

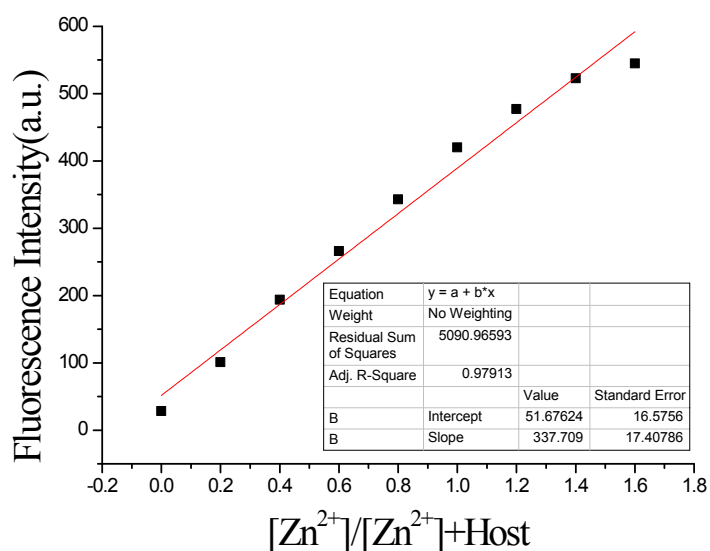

**Fig. S6.** Plot of the intensity at 524 nm for a mixture of probe **Y** and  $Zn^{2+}$  in DMSO/H<sub>2</sub>O (v/v=9/1) pH=7.2 buffer system of HEPES ( $\lambda_{ex}$  = 355 nm)

**Immunity test of Y to  $Zn^{2+}$ .**

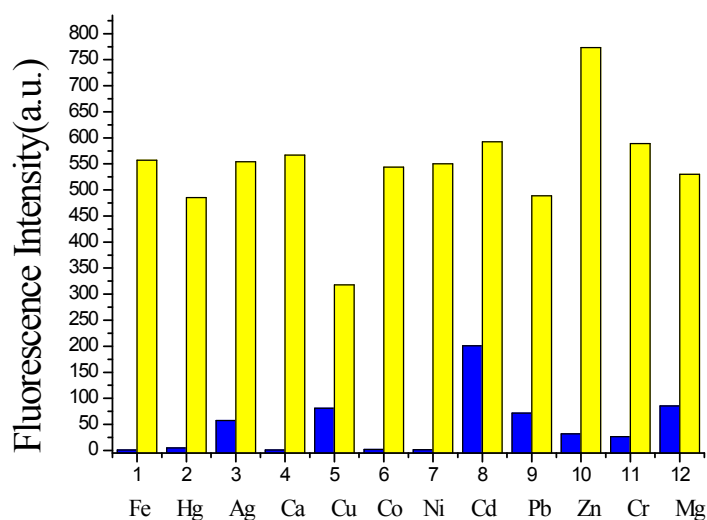

**Fig.S7.** Fluorescence intensity changes of **Y** ( $c = 2 \times 10^{-5}$  M) upon addition of 10 equiv. of  $Zn^{2+}$  ( $c = 4 \times 10^{-3}$  M) and 10 equiv. of various interference anions ( $c = 4 \times 10^{-3}$  M) (Left to right 1-12 is  $Fe^{3+}$ ,  $Hg^{2+}$ ,  $Ag^+$ ,  $Ca^{2+}$ ,  $Cu^{2+}$ ,  $Co^{2+}$ ,  $Ni^{2+}$ ,  $Cd^{2+}$ ,  $Pb^{2+}$ ,  $Zn^{2+}$ ,  $Cr^{3+}$  and  $Mg^{2+}$ ). Blue bars represent the responses of **Y** to the ions of interest. Yellow



bars represent the subsequent addition of  $Zn^{2+}$  to **Y**.

### The IR experiments of **Y** to $Zn^{2+}$ .

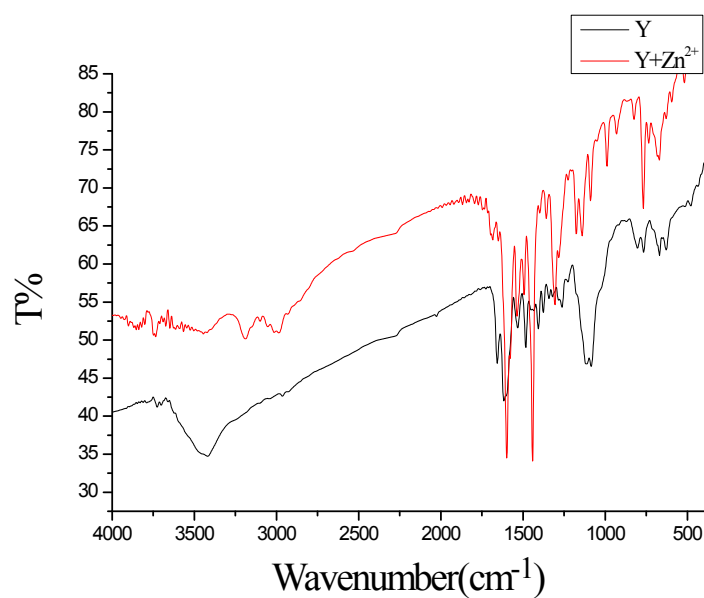

**Fig. S8.** IR spectrums of compound **Y** and **Y+Zn<sup>2+</sup>**.

### The time response experiments of **Y** to $Zn^{2+}$ in different water ratio.

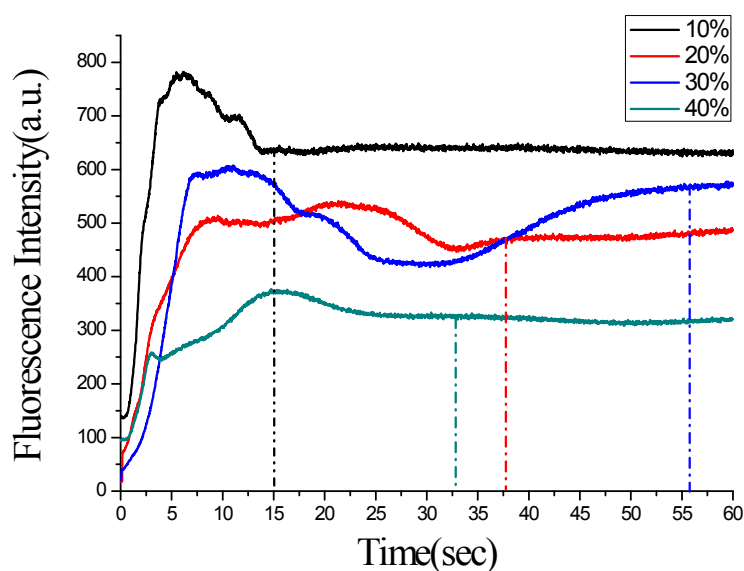

**Fig. S9.** Fluorescence intensity at 524 nm for **Y** ( $c=2.0 \times 10^{-5}$  M) in a mixture of DMSO/H<sub>2</sub>O ( $v/v=9/1$ ;  $8/2$ ;  $7/3$ ;  $6/4$ ) solution pH=7.2 buffer system of HEPES after

addition of 10 equivalents of  $\text{Zn}^{2+}$  ( $c=4 \times 10^{-3}$  M).
